# Supplementary material
Source: publisher figshare collection journal article supplement (https://rs.figshare.com/ndownloader/files/17837981)

**1H NMR of 3 (Aromatic expansion only)**

**2-Phenylimidazo[1,2-a]pyridine (3a)**

**
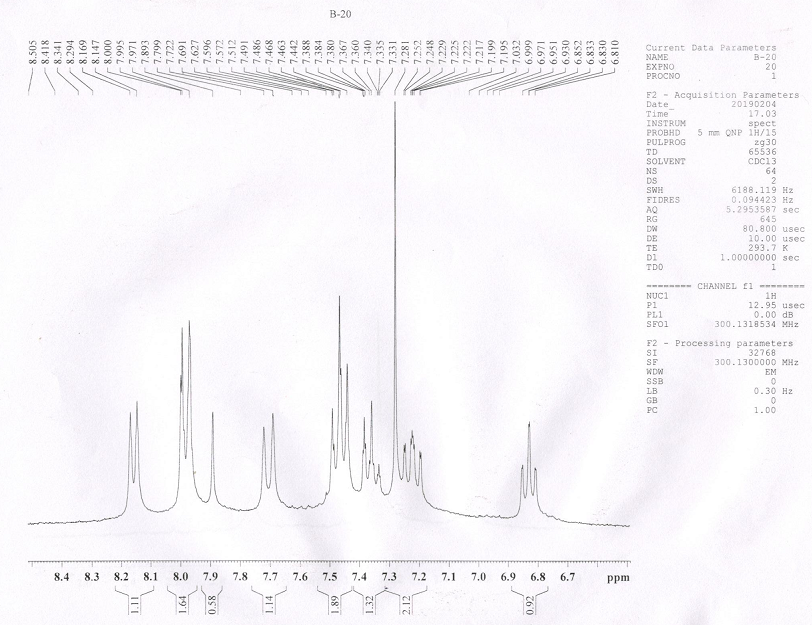
**

**4-(Imidazo[1,2-a]pyridin-2-yl)benzonitrile (3b)**

**
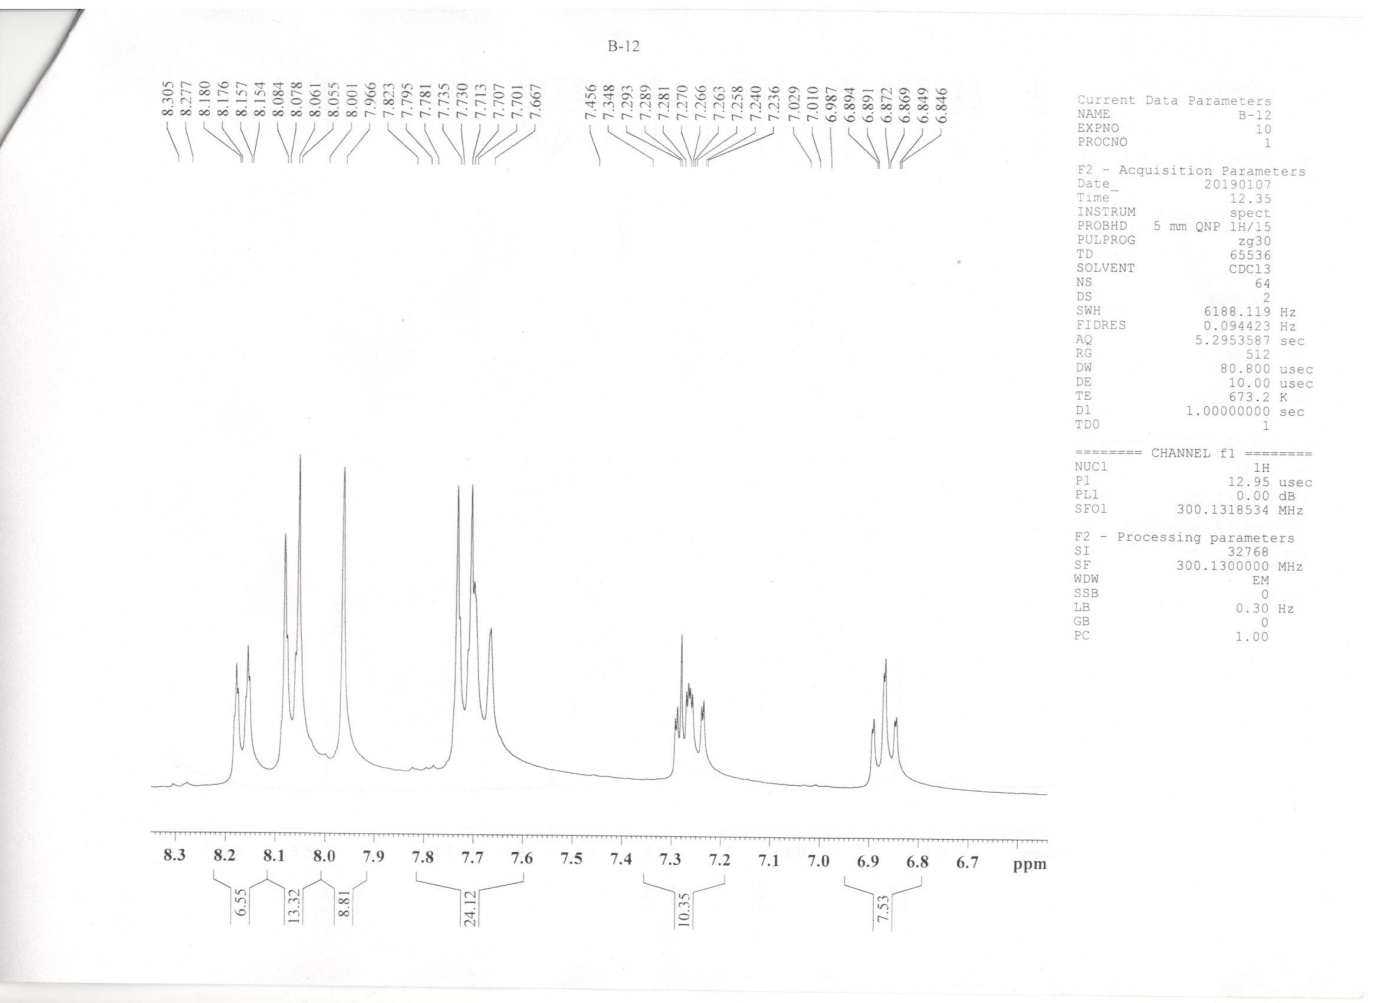
**

**2-(3-Nitrophenyl)imidazo[1,2-a]pyridine (3c)**


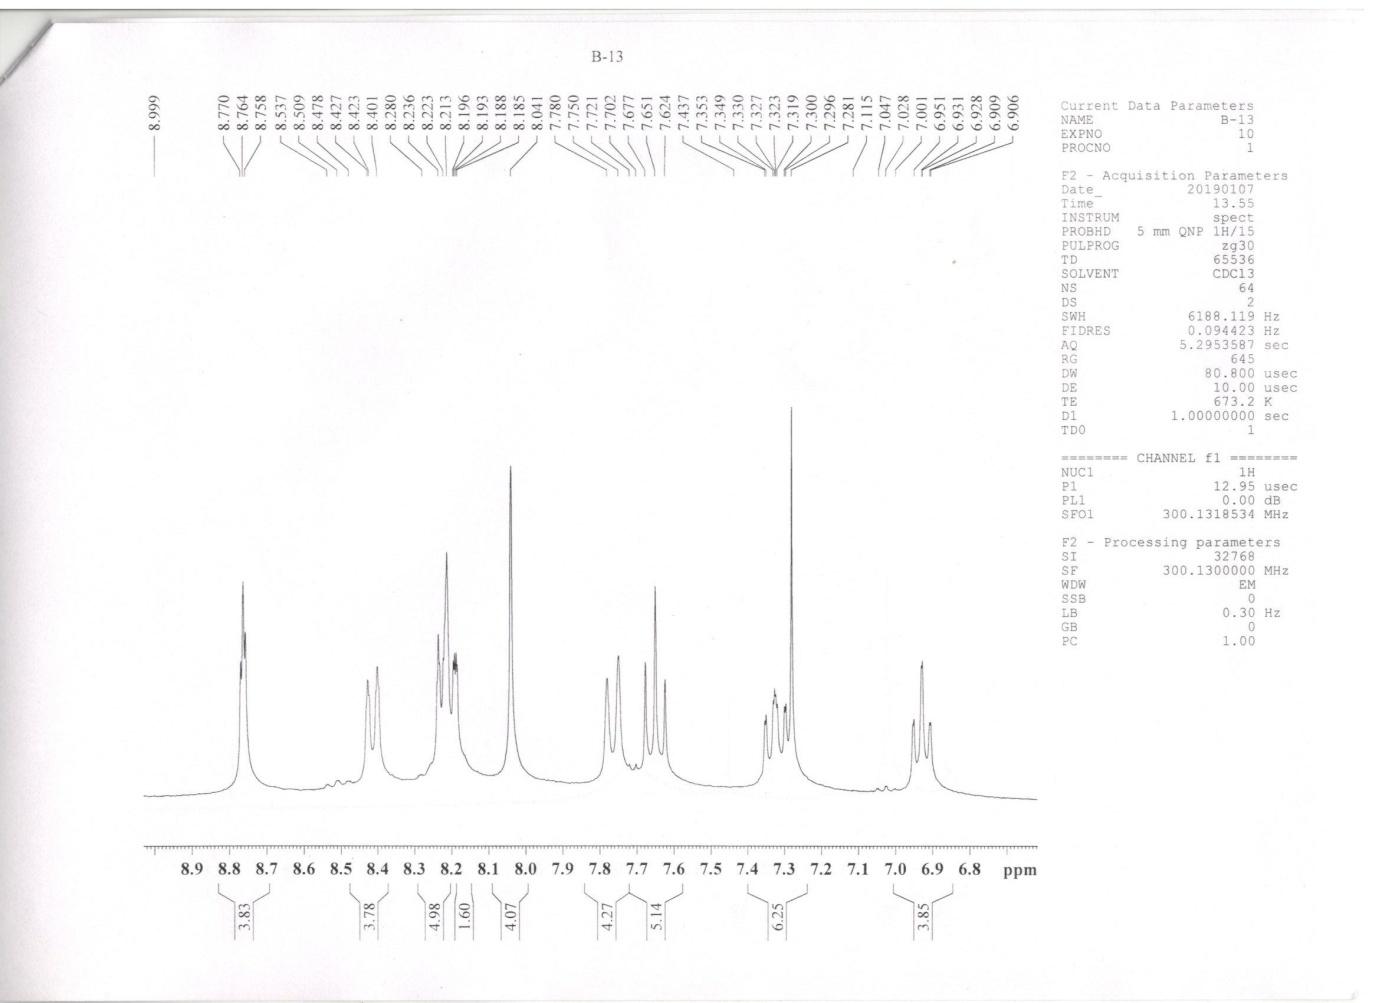


**2-(4-Bromophenyl)imidazo[1,2-a]pyridine (3d)**

**
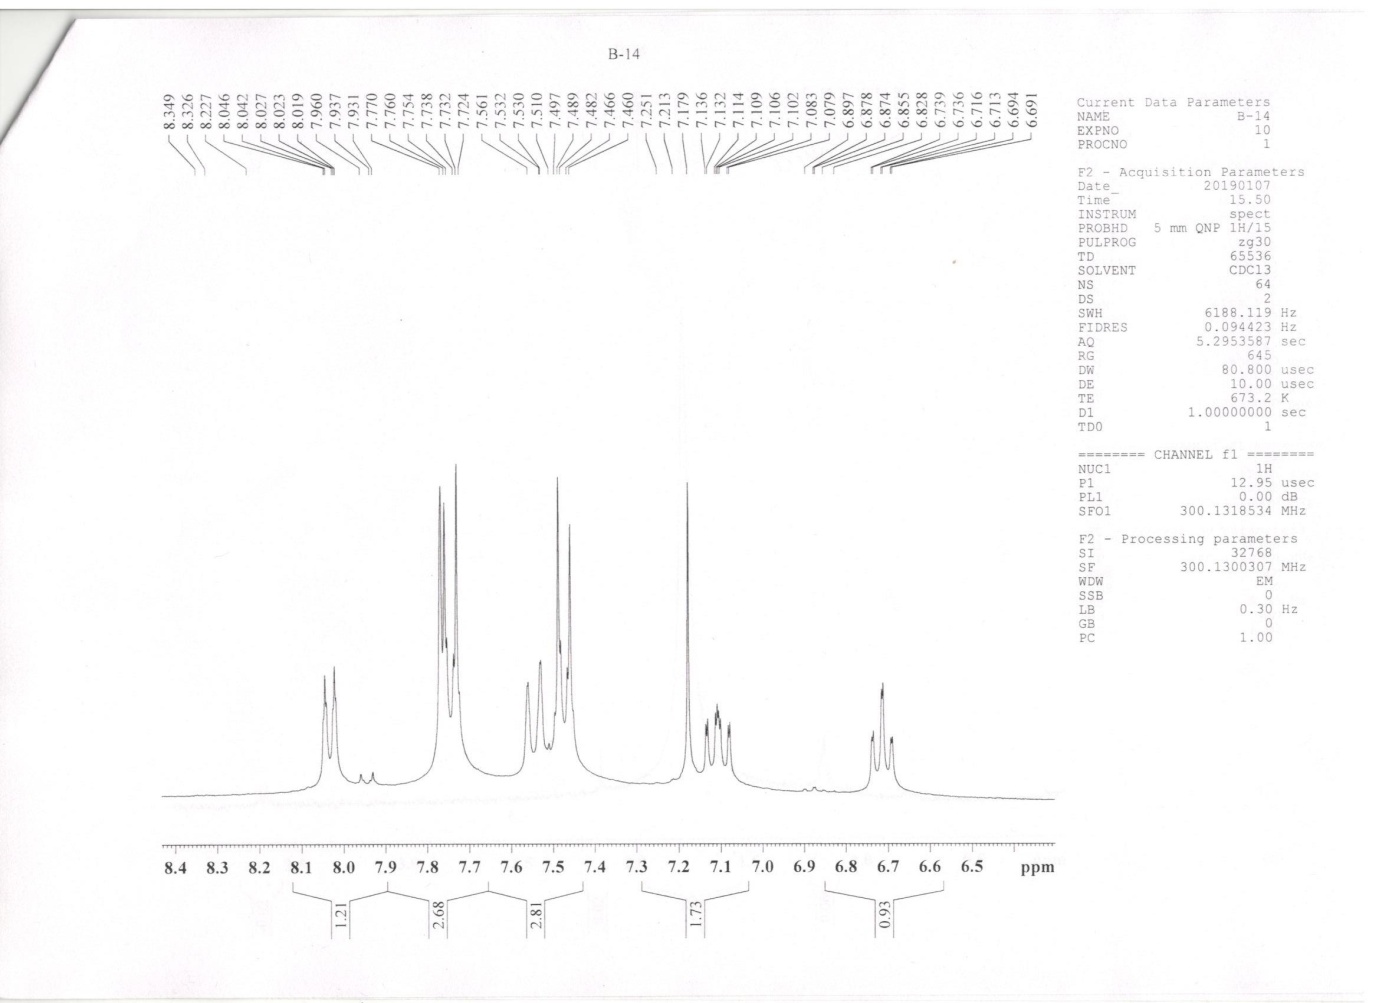
**

**2-(4-Chlorophenyl)imidazo[1,2-a]pyridine (3e)**

**
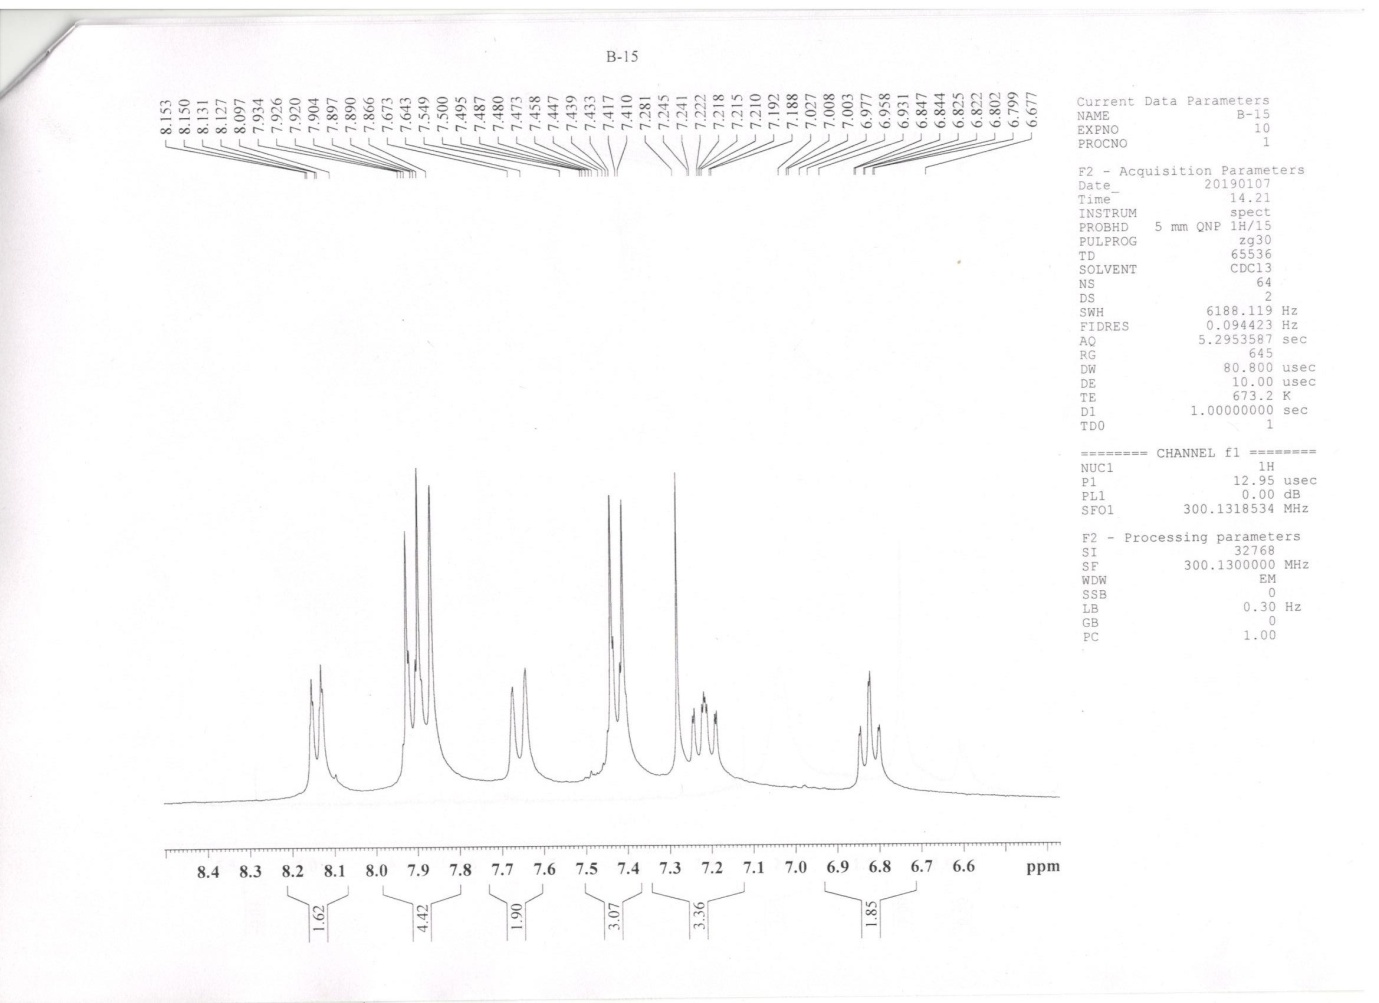
**

**2-(4-Fluorophenyl)imidazo[1,2-a]pyridine (3f)**


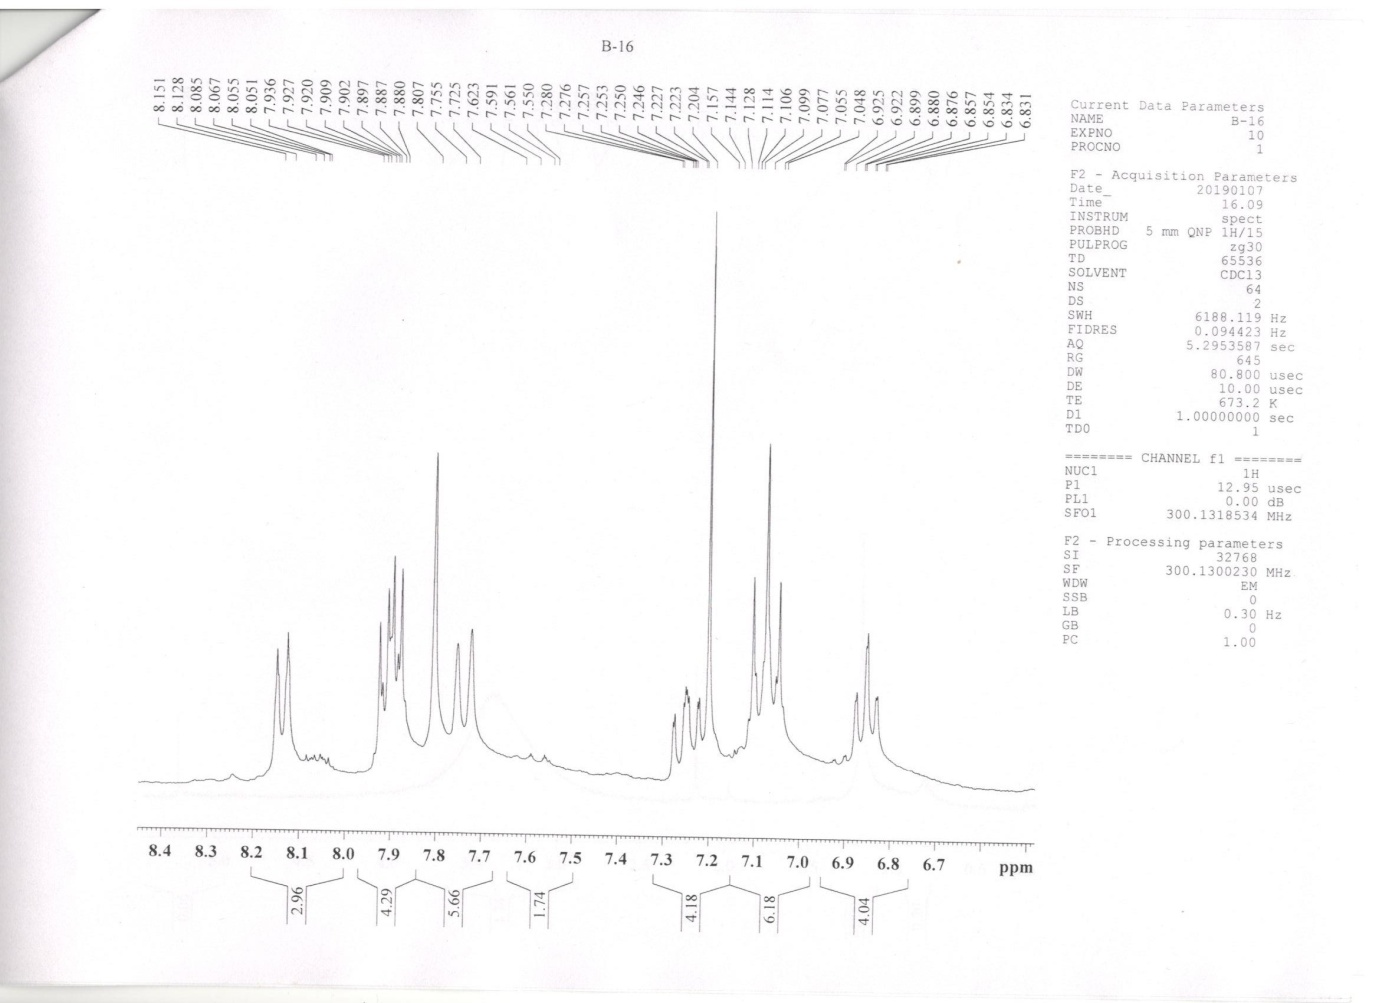


**2-(4-Methylphenyl)imidazo[1,2-a]pyridine (3g)**


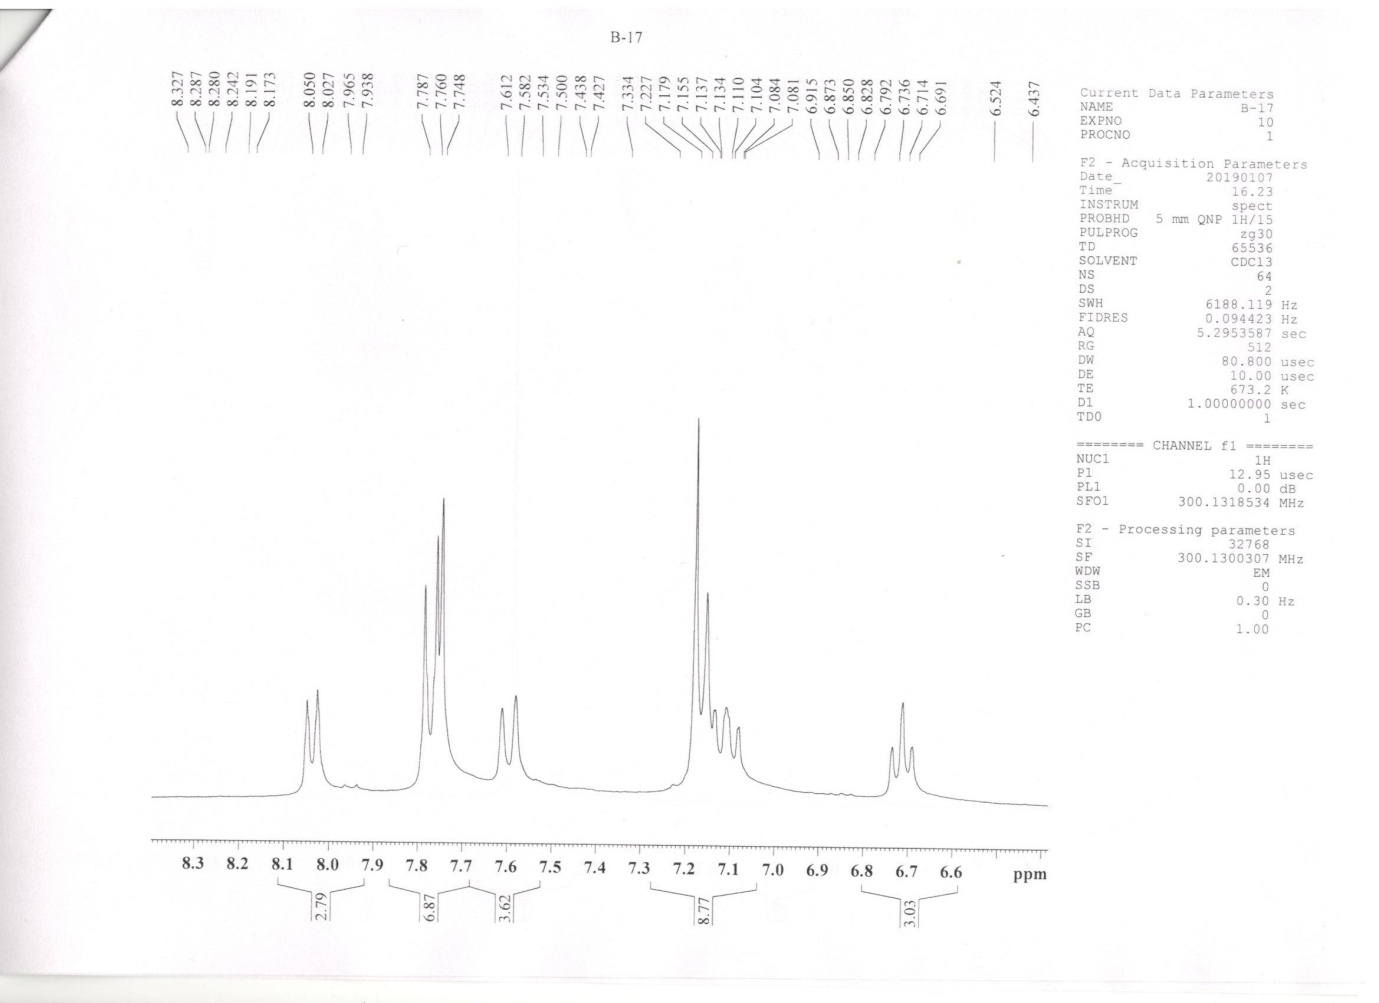


**2-(4-Methoxyphenyl)imidazo[1,2-a]pyridine (3h)**


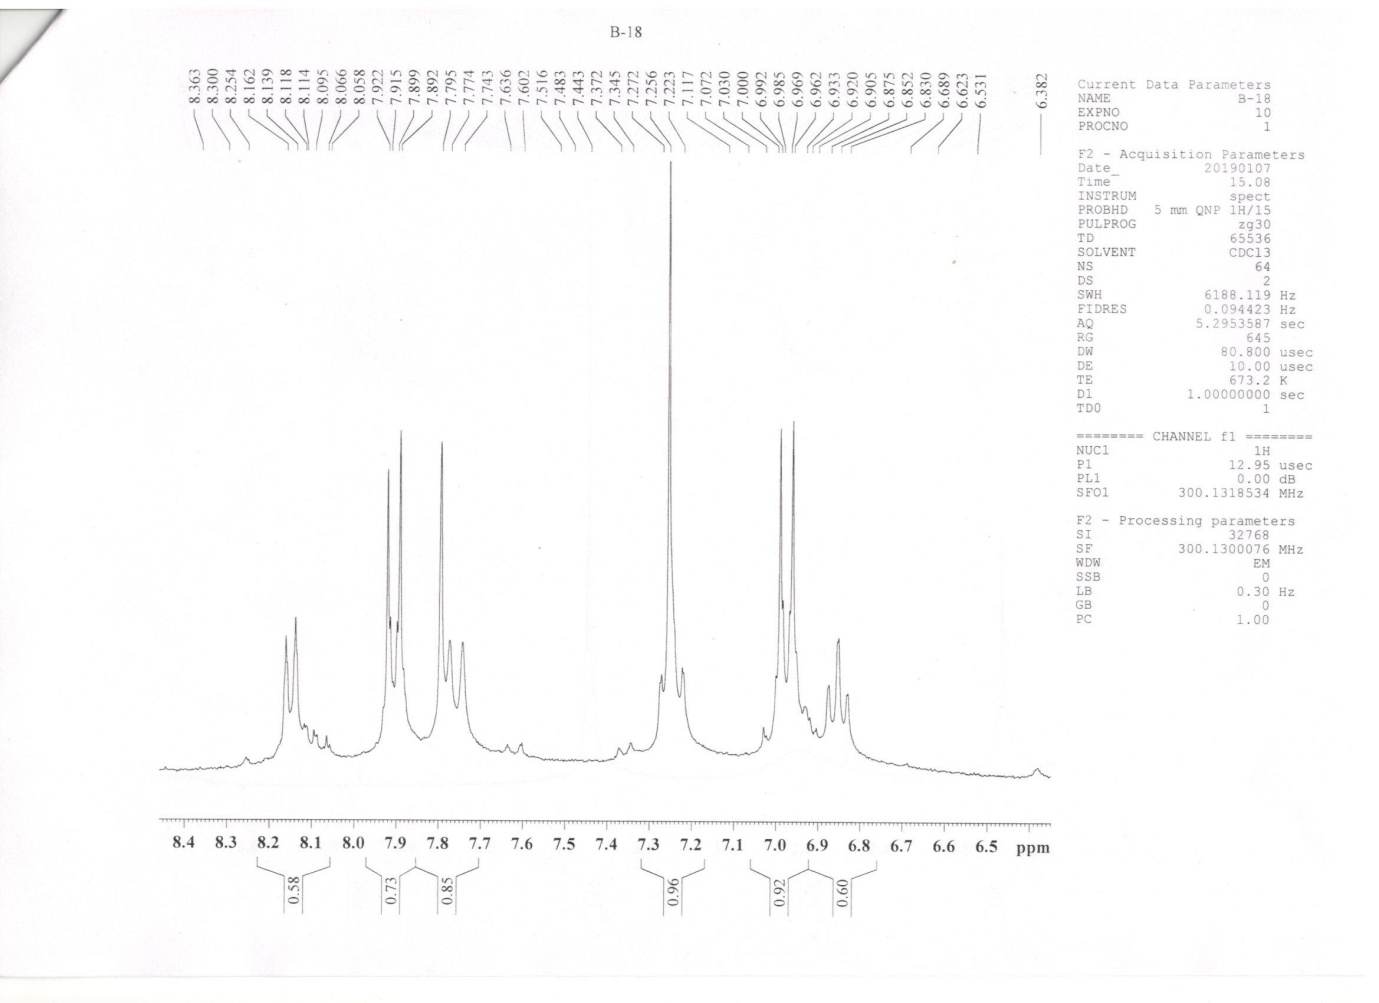


**2-(3-Methoxyphenyl)imidazo[1,2-a]pyridine (3i)**


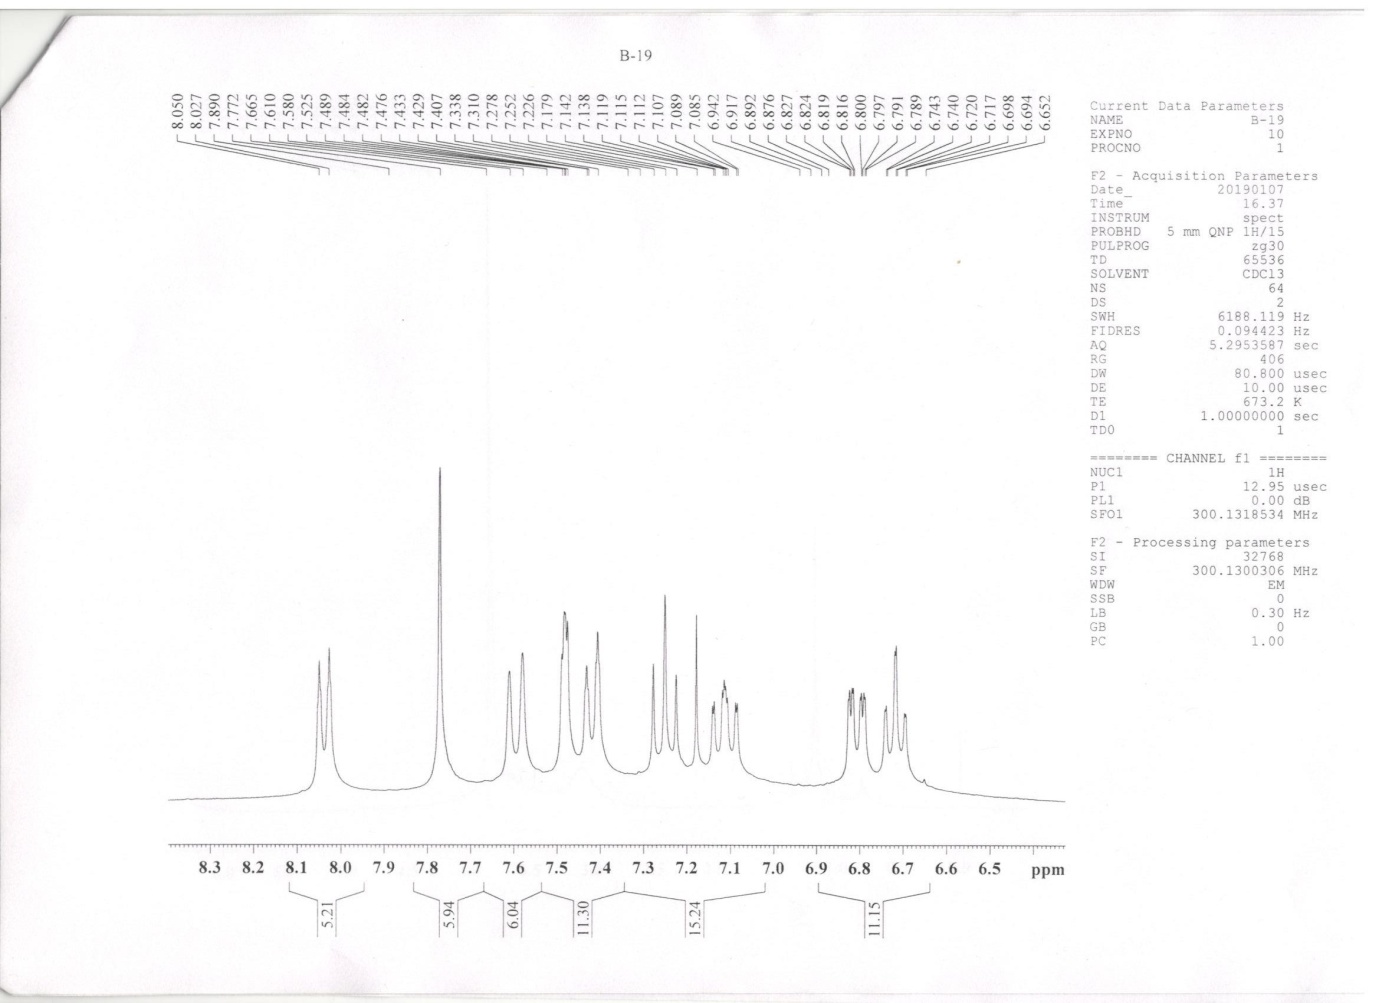


**2-(4-Nitrophenyl)imidazo[1,2-*a*]pyridine(3j)**


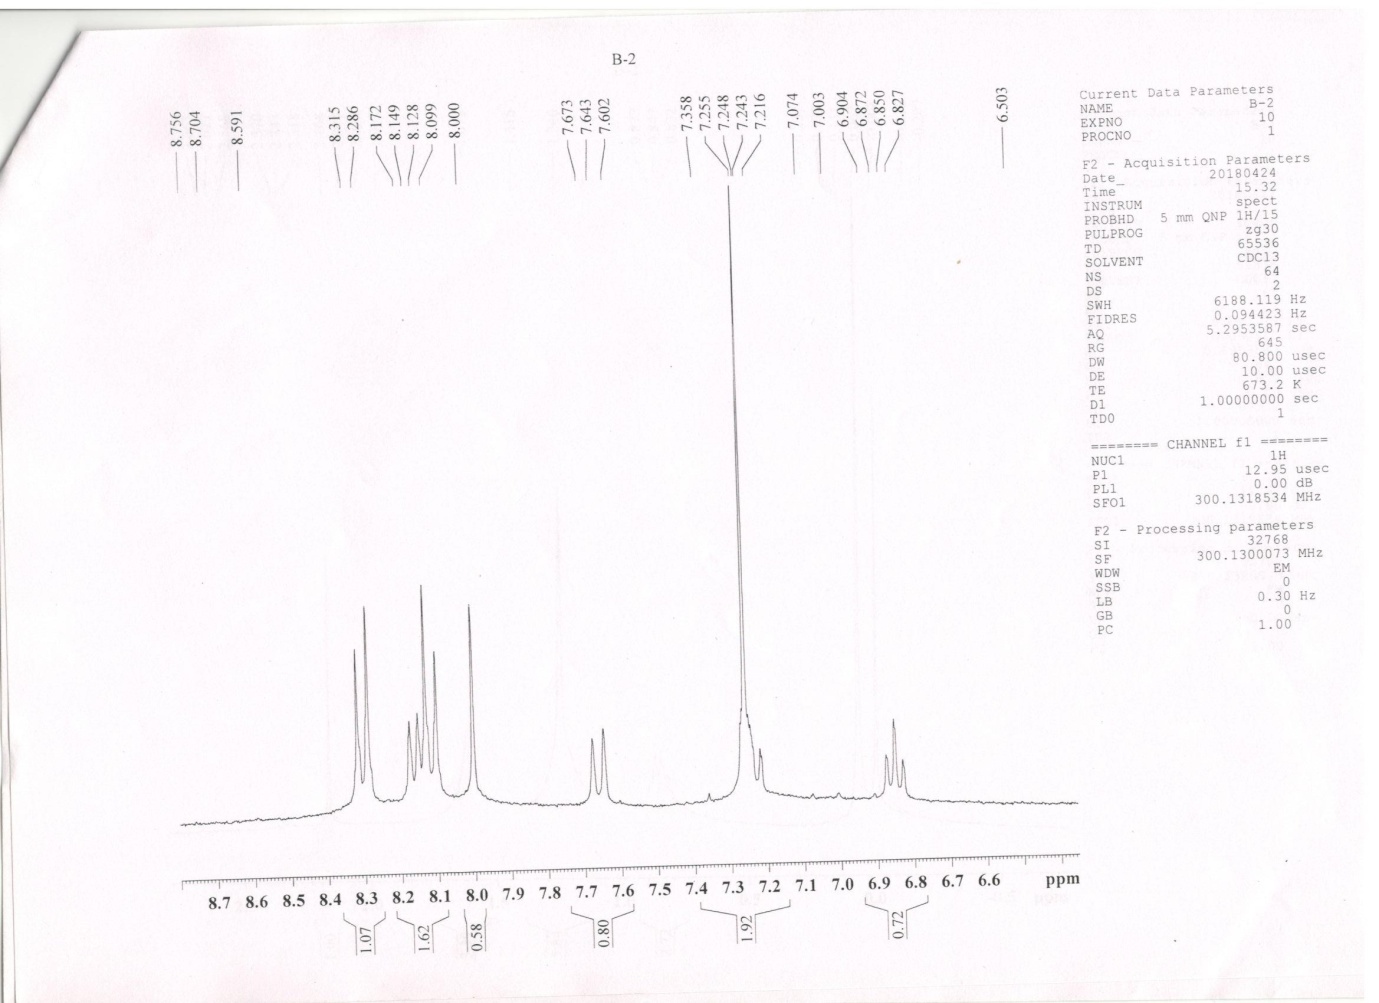


Mass spectrum of Pyridinium salt (**A**)


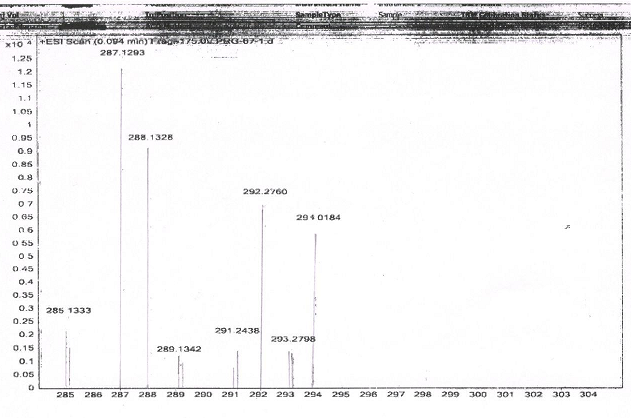

Supplement: Supplementary file 1 [file 17837981]
